# Supplementary material for: Efficacy of continued cetuximab for unresectable metastatic colorectal cancer after disease progression during first-line cetuximab-based chemotherapy: a retrospective cohort study
Source: PubMed Central journal article supplement (PMC4905480; doi:10.18632/oncotarget.7193), 2016-02-04
Supplement: oncotarget-07-11380-s001.pdf [file oncotarget-07-11380-s001.pdf]

# Efficacy of continued cetuximab for unresectable metastatic colorectal cancer after disease progression during first-line cetuximab-based chemotherapy: a retrospective cohort study

## Supplementary Materials

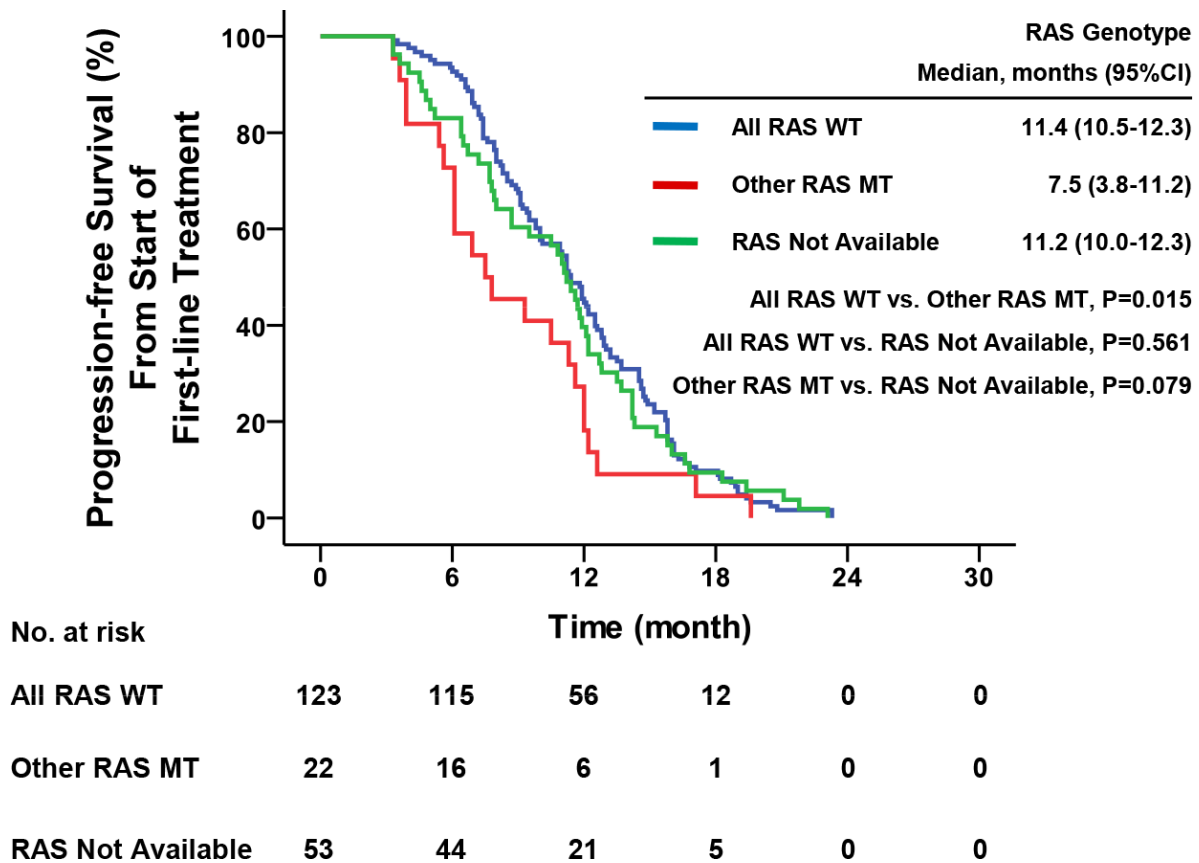

**Supplementary Figure S1: Patients with other RAS mutation had poorer first-line PFS.** Kaplan-Meier curves of first-line progression-free survival with standard first-line cetuximab-based treatment. Patients with all RAS wild type had significantly better first-line progression-free survival than patients with other RAS mutation. WT: wild type; MT: mutant type. P: log-rank test.

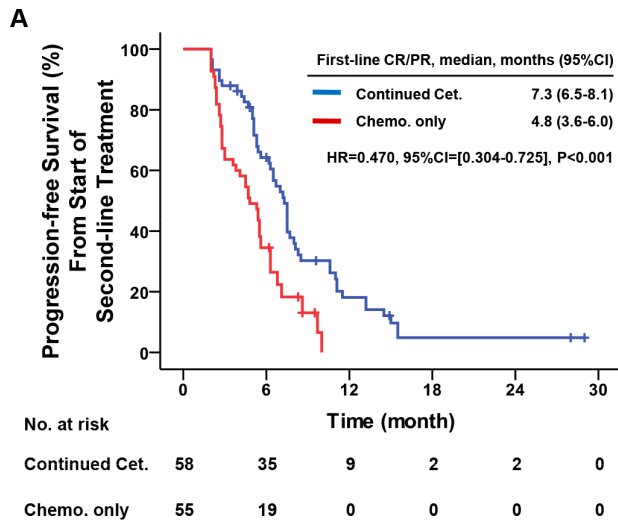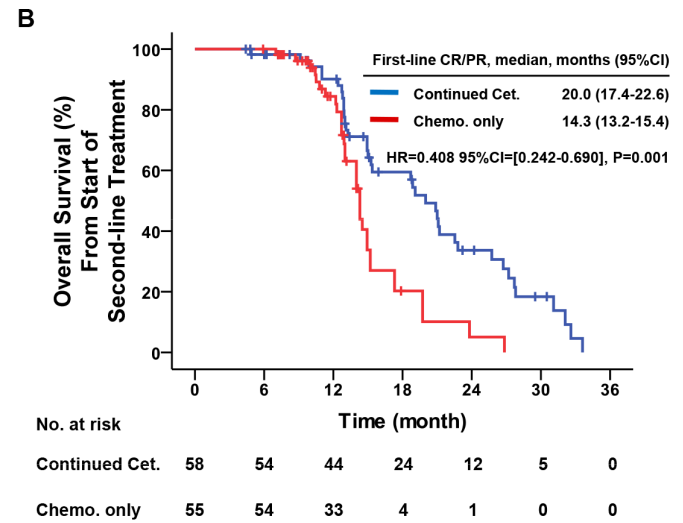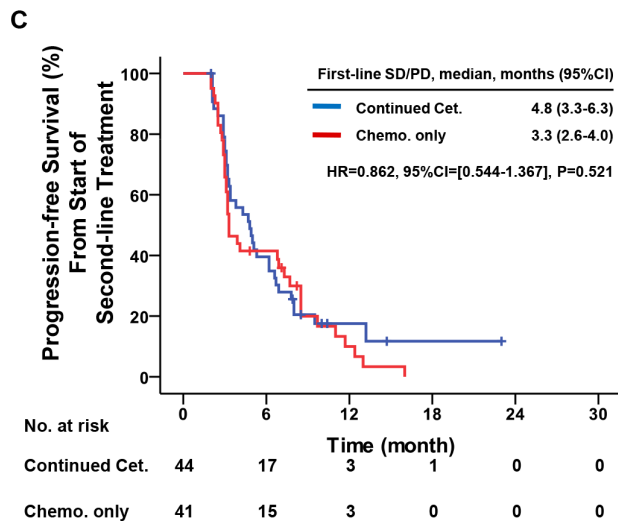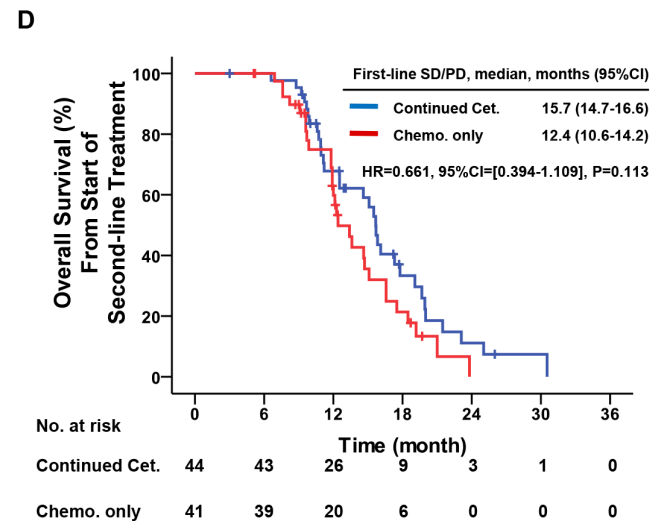

**Supplementary Figure S2: First-line overall response as a predictor for the efficacy of second-line treatment.** (A) Kaplan-Meier progression-free survival and (B) overall survival curves for patients reached CR/PR in first-line treatment, (C) progression-free survival and (D) overall survival curves for patients with first-line SD/PD, comparing the continued cetuximab plus changed chemotherapy and changed chemotherapy only as second-line treatment. Cet.: Cetuximab; Chemo.: chemotherapy; CR: complete response; PR: partial response; SD: stable disease; PD: progressive disease; HR hazard ratio; CI: confidence interval. *P* value: by log-rank test.

**Supplementary Table S1: Univariate and multivariate analysis for second-line progression-free survival**

|                         | Second-line median PFS (month) | Univariate analysis |             |                    | Multivariate analysis |             |                    |
|-------------------------|--------------------------------|---------------------|-------------|--------------------|-----------------------|-------------|--------------------|
|                         |                                | HR                  | 95% CI      | P value            | HR                    | 95% CI      | P value            |
| Age - year              |                                |                     |             |                    |                       |             |                    |
| ≤ 55                    | 5.4                            | 1                   | -           | -                  | 1                     | -           | -                  |
| > 55                    | 5.3                            | 1.183               | 0.872–1.605 | 0.280              | 1.269                 | 0.915–1.761 | 0.154              |
| Sex                     |                                |                     |             |                    |                       |             |                    |
| Male                    | 5.6                            | 1                   | -           | -                  | 1                     | -           | -                  |
| Female                  | 5.0                            | 1.274               | 0.927–1.750 | 0.135              | 1.331                 | 0.932–1.901 | 0.116              |
| ECOG performance status |                                |                     |             |                    |                       |             |                    |
| 0                       | 5.5                            | 1                   | -           | -                  | 1                     | -           | -                  |
| 1–2                     | 5.3                            | 1.123               | 0.826–1.528 | 0.459              | 1.098                 | 0.421–1.056 | 0.586              |
| Primary tumor site      |                                |                     |             |                    |                       |             |                    |
| Right-sided colon       | 4.8                            | 1                   | -           | -                  | 1                     | -           | -                  |
| Left-sided colon        | 7.1                            | 0.660               | 0.442–0.987 | <b>0.043*</b>      | 0.667                 | 0.421–1.056 | <b>0.084</b>       |
| Rectum                  | 5.3                            | 1.016               | 0.714–1.446 | 0.928              | 1.051                 | 0.702–1.574 | 0.808              |
| Organs with metastases  |                                |                     |             |                    |                       |             |                    |
| Liver only              | 5.5                            | 1                   | -           | -                  | 1                     | -           | -                  |
| Liver plus others       | 5.3                            | 1.030               | 0.711–1.494 | 0.874              | 0.925                 | 0.622–1.376 | 0.701              |
| Non-liver               | 5.1                            | 0.973               | 0.493–1.921 | 0.937              | 0.817                 | 0.399–1.674 | 0.581              |
| Other RAS genotype      |                                |                     |             |                    |                       |             |                    |
| Wild type               | 6.3                            | 1                   | -           | -                  | 1                     | -           | -                  |
| Mutant type             | 3.3                            | 1.807               | 1.124–2.906 | <b>0.015*</b>      | 2.141                 | 1.285–3.569 | <b>0.003*</b>      |
| Not available           | 3.9                            | 1.178               | 0.832–1.669 | 0.355              | 1.221                 | 0.837–1.782 | 0.299              |
| BRAF genotype           |                                |                     |             |                    |                       |             |                    |
| Wild type               | 5.6                            | 1                   | -           | -                  | 1                     | -           | -                  |
| Mutant type             | 3.2                            | 2.859               | 1.615–5.063 | <b>&lt; 0.001*</b> | 3.001                 | 1.639–5.494 | <b>&lt; 0.001*</b> |
| Primary tumor resection |                                |                     |             |                    |                       |             |                    |
| No                      | 4.7                            | 1                   | -           | -                  | 1                     | -           | -                  |
| Yes                     | 5.5                            | 0.964               | 0.685–1.357 | 0.834              | 0.813                 | 0.566–1.170 | 0.265              |

|                                         |     |       |             |               |       |             |               |
|-----------------------------------------|-----|-------|-------------|---------------|-------|-------------|---------------|
| In first-line cetuximab-based treatment |     |       |             |               |       |             |               |
| Chemotherapy regimen                    |     |       |             |               |       |             |               |
| mFOLFOX6                                | 5.6 | 1     | -           | -             | 1     | -           | -             |
| FOLFIRI                                 | 4.8 | 1.058 | 0.778–1.439 | 0.721         | 0.903 | 0.635–1.284 | 0.570         |
| Maintenance treatment                   |     |       |             |               |       |             |               |
| No                                      | 5.3 | 1     | -           | -             | 1     | -           | -             |
| Yes                                     | 5.5 | 1.015 | 0.732–1.407 | 0.929         | 1.086 | 0.693–1.702 | 0.719         |
| Early tumor shrinkage                   |     |       |             |               |       |             |               |
| No                                      | 4.8 | 1     | -           | -             | 1     | -           | -             |
| Yes                                     | 6.3 | 0.709 | 0.522–0.963 | <b>0.028*</b> | 0.682 | 0.473–0.984 | <b>0.041*</b> |
| Overall response                        |     |       |             |               |       |             |               |
| SD or PD                                | 4.1 | 1     | -           | -             | 1     | -           | -             |
| CR or PR                                | 5.6 | 0.852 | 0.629–1.155 | 0.303         | 0.809 | 0.504–1.298 | 0.379         |
| Acne-like rash, grade                   |     |       |             |               |       |             |               |
| 0–1                                     | 5.3 | 1     | -           | -             | 1     | -           | -             |
| ≥ 2                                     | 5.5 | 1.002 | 0.733–1.370 | 0.991         | 1.125 | 0.782–1.617 | 0.527         |
| Second-line continued cetuximab         |     |       |             |               |       |             |               |
| No                                      | 4.5 | 1     | -           | -             | 1     | -           | -             |
| Yes                                     | 6.3 | 0.646 | 0.476–0.877 | <b>0.005*</b> | 0.675 | 0.491–0.930 | <b>0.016*</b> |

HR: hazard ratio; CI: confidence interval.

ECOG: Eastern Cooperative Oncology Group.

Other RAS including KRAS exons 3 (codon 59 and 61) and exon 4 (codon 117 and 146), NRAS exons 2 (codon 12 and 13), exon 3 (codon 59 and 61) and 4 (codon 117 and 146).

P values were calculated using Cox regression.

Bold font for  $P < 0.10$ ; \* for  $P < 0.05$ .
